# Supplementary material for: Estimating the cumulative incidence of COVID-19 in the United States using influenza surveillance, virologic testing, and mortality data: Four complementary approaches
Source: PLoS Comput Biol. 2021 Jun 17;17(6):e1008994. doi: 10.1371/journal.pcbi.1008994 (PMC8241061; doi:10.1371/journal.pcbi.1008994)
Supplement: S3 Text — Sensitivity analysis on different assumptions of COVID Scaling. (PDF) [file pcbi.1008994.s005.pdf]

## COVID Scaling Sensitivity Analysis

The COVID Scaling method estimates the probability  $p_{jt}$  that a given ILI patient in state  $j$  and week  $t$  has COVID-19. Although we account for sparse data, testing backlogs, and false negatives, we must assume that testing is applied uniformly conditional on observable data. That is, the probability a patient is tested for COVID-19, conditional on the observed symptoms, is independent of whether they have COVID-19 or a different illness. This assumption can break, for example when health workers at a nursing home outbreak are preemptively tested. Because this form of confounding is difficult to measure, we conduct a sensitivity analysis.

The most likely failure of this assumption is that testing is biased towards patients more likely to have COVID-19. Let  $C$  denote having COVID-19 and  $T$  denote being tested. Let  $p_{true} = p_{jt} = P(C)$  and  $p_{obs}$  be the posterior estimate from the COVID Scaling method. Since

$$p_{obs} = P(C|T) = \frac{P(T|C)P(C)}{P(T|C)P(C) + P(T|C^c)P(C^c)}$$

We model  $P(T|C) = \alpha P(T|C^c)$ , where  $\alpha > 1$ , with an extreme of  $\alpha = 1.5$ , meaning that the COVID-19 infected are 50% more likely than non-infected to get tested. Then

$$p_{obs} = \frac{\alpha P(T|C^c)p_{true}}{\alpha P(T|C^c)p_{true} + P(T|C^c)(1 - p_{true})}$$

yielding

$$p_{true} = \frac{p_{obs}}{\alpha - \alpha p_{obs} + p_{obs}}$$

Finally, in each state, we vary  $\alpha$  linearly with testing availability, defined by number of COVID-19 tests over total ILI patients for each week, such that the minimum availability receives  $\alpha = 1.5$  and maximum availability receives  $\alpha = 1.0$ . This gives adjusted probabilities, which we use to recompute COVID-19 projections. The ratios of cases after this adjustment to the original projected cases are shown in Table A.

| Max $\alpha$ | 25%  | 50%  | 75%  |
|--------------|------|------|------|
| 1.5          | 0.78 | 0.81 | 0.88 |
| 1.25         | 0.87 | 0.89 | 0.93 |
| 1.10         | 0.94 | 0.95 | 0.97 |

Table A: The median and quartile scaling adjustments across states when we assume varying levels of  $\alpha$  (the increased likelihood for COVID-19 positive patients to get tested). For example, in the most extreme  $\alpha$ , the median state had an estimated case count of 0.81 times the original estimate from COVID Scaling.
